# Supplementary material for: Black Sea outflow response to Holocene meltwater events
Source: Springer Nature journal article supplement (doi:10.1038/s41598-018-22453-z), 2018-02-28
Supplement: MOESM1 [file 41598_2018_22453_MOESM1_ESM.pdf]

## Black Sea outflow response to Holocene meltwater events

Jens O. Herrle<sup>1,2\*</sup>, Jörg Bollmann<sup>3</sup>, Christina Gebühr<sup>1,2</sup>, Hartmut Schulz<sup>4</sup>, Rosie M. Sheward<sup>1</sup>, Annika Giesenberg<sup>1</sup>

**Supplement Table 1.** Table of dated materials, AMS-<sup>14</sup>C ages, corrections and conversions into calendar ages (**bold <sup>14</sup>C ages measured in this study** all other <sup>14</sup>C ages are taken from reference 9, PF = planktic foraminifera, *G. ruber* = *Globigerinoides ruber*; *G. bulloides* = *Globigerina bulloides*).

| Lab_Code #         | Sampled Depth Interval (cm) | Mean Sample Depth (cm) | Sampled Material Sieved size fraction         | Conventional Radiocarbon Age (yr BP) | Calendar Age 2-sigma error 95% probability (Cal yr BP) this study |
|--------------------|-----------------------------|------------------------|-----------------------------------------------|--------------------------------------|-------------------------------------------------------------------|
| KIA28411           | 208-212                     | 210.0                  | <i>G. ruber</i> >200 µm                       | 5265±35                              | 5516 (5444-5583)                                                  |
| KIA28412           | 268.5-272                   | 270.3                  | <i>G. ruber</i> >200 µm                       | 6570±45                              | 6953 (6824-7109)                                                  |
| <b>Beta-438196</b> | <b>283-284</b>              | <b>283.5</b>           | <b>mixed PF &gt;200 µm</b>                    | <b>7290±30</b>                       | <b>7612 (7571-7706)</b>                                           |
| KIA28413           | 298-302                     | 300.0                  | <i>G. ruber</i> , <i>G. bulloides</i> >200 µm | 7805±40                              | 8152 (8034-8273)                                                  |
| <b>Beta-438197</b> | <b>307-308</b>              | <b>307.5</b>           | <b>mixed PF &gt;200 µm</b>                    | <b>8030±30</b>                       | <b>8392 (8314-8442)</b>                                           |
| KIA28414           | 353-358                     | 355.5                  | <i>G. ruber</i> >200 µm                       | 9205±55                              | 9819 (9619-10049)                                                 |

**Supplement Table 2. Measurements of *E. huxleyi* placoliths, sedimentation rate, and calculated sea surface salinity and anomaly of core SL152 (psu = practical salinity units).**

| Sample No. | Core depth (top cm) | Core depth (bottom cm) | Best age (cal BP) | Sedimentation rate (cm/1000 years) | No. <i>E. huxleyi</i> coccoliths measured per sample | Mean coccolith length ( $\mu\text{m}$ ) | Mean central area width (CAW, $\mu\text{m}$ ) | Mean central area area, (CAA, $\mu\text{m}^2$ ) | Sea surface salinity (psu), plankton calibration subset 4 | Sea surface salinity anomaly (psu) |
|------------|---------------------|------------------------|-------------------|------------------------------------|------------------------------------------------------|-----------------------------------------|-----------------------------------------------|-------------------------------------------------|-----------------------------------------------------------|------------------------------------|
| SL152 261  | 190.0               | 191.0                  | 5096              | 22.32                              | 42                                                   | 3.62                                    | 0.84                                          | 1.28                                            | 38.35                                                     | 0.70                               |
| SL152 262  | 195.0               | 196.0                  | 5185              | 22.23                              | 41                                                   | 3.60                                    | 0.84                                          | 1.26                                            | 38.07                                                     | 0.42                               |
| SL152 263  | 200.0               | 201.0                  | 5296              | 22.12                              | 47                                                   | 3.68                                    | 0.83                                          | 1.27                                            | 38.67                                                     | 1.02                               |
| SL152 264  | 205.0               | 206.0                  | 5406              | 21.99                              | 47                                                   | 3.53                                    | 0.82                                          | 1.22                                            | 37.94                                                     | 0.29                               |
| SL152 265  | 210.0               | 211.0                  | 5516              | 21.84                              | 49                                                   | 3.58                                    | 0.85                                          | 1.26                                            | 37.79                                                     | 0.14                               |
| SL152 266  | 215.0               | 216.0                  | 5625              | 21.83                              | 46                                                   | 3.66                                    | 0.87                                          | 1.33                                            | 38.31                                                     | 0.66                               |
| SL152 268  | 225.0               | 226.0                  | 5846              | 22.46                              | 44                                                   | 3.68                                    | 0.86                                          | 1.32                                            | 38.50                                                     | 0.85                               |
| SL152 269  | 230.0               | 231.0                  | 5959              | 23.1                               | 47                                                   | 3.55                                    | 0.81                                          | 1.19                                            | 37.81                                                     | 0.16                               |
| SL152 270  | 235.0               | 236.0                  | 6077              | 23.95                              | 30                                                   | 3.62                                    | 0.80                                          | 1.18                                            | 38.21                                                     | 0.56                               |
| SL152 271  | 240.0               | 241.0                  | 6199              | 25.03                              | 48                                                   | 3.53                                    | 0.80                                          | 1.17                                            | 37.81                                                     | 0.16                               |
| SL152 272  | 245.0               | 246.0                  | 6327              | 26.32                              | 32                                                   | 3.67                                    | 0.84                                          | 1.26                                            | 38.29                                                     | 0.64                               |
| SL152 273  | 250.0               | 251.0                  | 6462              | 27.82                              | 44                                                   | 3.56                                    | 0.83                                          | 1.23                                            | 37.85                                                     | 0.20                               |
| SL152 274  | 255.0               | 256.0                  | 6605              | 29.54                              | 37                                                   | 3.54                                    | 0.86                                          | 1.29                                            | 37.73                                                     | 0.08                               |
| SL152 275  | 260.0               | 261.0                  | 6757              | 31.48                              | 44                                                   | 3.44                                    | 0.83                                          | 1.20                                            | 37.26                                                     | -0.39                              |
| SL152 276  | 265.0               | 266.0                  | 6919              | 33.64                              | 35                                                   | 3.51                                    | 0.84                                          | 1.25                                            | 37.67                                                     | 0.02                               |
| SL152 277  | 270.0               | 271.0                  | 7092              | 35.99                              | 45                                                   | 3.52                                    | 0.87                                          | 1.32                                            | 37.76                                                     | 0.11                               |
| SL152 286  | 275.0               | 275.5                  | 7267              | 37.42                              | 48                                                   | 3.52                                    | 0.82                                          | 1.21                                            | 37.82                                                     | 0.17                               |
| SL152 296  | 280.0               | 280.5                  | 7455              | 37.46                              | 44                                                   | 3.50                                    | 0.85                                          | 1.27                                            | 37.62                                                     | -0.03                              |
| SL152 302  | 283.0               | 283.5                  | 7566              | 36.76                              | 50                                                   | 3.34                                    | 0.83                                          | 1.19                                            | 36.66                                                     | -0.99                              |
| SL152 303  | 283.5               | 284.0                  | 7585              | 36.61                              | 51                                                   | 3.41                                    | 0.85                                          | 1.25                                            | 37.12                                                     | -0.53                              |
| SL152 304  | 284.5               | 285.0                  | 7621              | 36.29                              | 46                                                   | 3.57                                    | 0.87                                          | 1.31                                            | 37.84                                                     | 0.19                               |
| SL152 305  | 285.0               | 285.5                  | 7639              | 36.14                              | 49                                                   | 3.58                                    | 0.90                                          | 1.39                                            | 38.00                                                     | 0.35                               |
| SL152 312  | 288.5               | 289.0                  | 7764              | 35.12                              | 46                                                   | 3.41                                    | 0.86                                          | 1.27                                            | 37.07                                                     | -0.58                              |
| SL152 314  | 289.5               | 290.0                  | 7799              | 34.85                              | 51                                                   | 3.43                                    | 0.83                                          | 1.21                                            | 37.31                                                     | -0.34                              |
| SL152 321  | 293.0               | 293.5                  | 7920              | 33.95                              | 50                                                   | 3.51                                    | 0.85                                          | 1.27                                            | 37.65                                                     | 0.00                               |
| SL152 323  | 294.0               | 294.5                  | 7954              | 33.72                              | 46                                                   | 3.50                                    | 0.82                                          | 1.20                                            | 37.57                                                     | -0.08                              |

| Sample No. | Core depth (top cm) | Core depth (bottom cm) | Best age (cal BP) | Sedimentation rate (cm/1000 years) | No. <i>E. huxleyi</i> coccoliths measured per sample | Mean coccolith length ( $\mu\text{m}$ ) | Mean central area width (CAW, $\mu\text{m}$ ) | Mean central area area, (CAA, $\mu\text{m}^2$ ) | Sea surface salinity (psu), plankton calibration subset 4 | Sea surface salinity anomaly (psu) |
|------------|---------------------|------------------------|-------------------|------------------------------------|------------------------------------------------------|-----------------------------------------|-----------------------------------------------|-------------------------------------------------|-----------------------------------------------------------|------------------------------------|
| SL152 325  | 295.0               | 295.5                  | 7988              | 33.49                              | 53                                                   | 3.46                                    | 0.82                                          | 1.19                                            | 37.31                                                     | -0.34                              |
| SL152 327  | 296.0               | 296.5                  | 8021              | 33.27                              | 46                                                   | 3.46                                    | 0.83                                          | 1.22                                            | 37.42                                                     | -0.23                              |
| SL152 329  | 297.0               | 297.5                  | 8054              | 33.06                              | 48                                                   | 3.45                                    | 0.85                                          | 1.28                                            | 37.58                                                     | -0.07                              |
| SL152 335  | 300.0               | 300.5                  | 8152              | 32.48                              | 45                                                   | 3.45                                    | 0.87                                          | 1.30                                            | 37.32                                                     | -0.33                              |
| SL152 336  | 300.5               | 301.0                  | 8169              | 32.39                              | 52                                                   | 3.46                                    | 0.84                                          | 1.23                                            | 37.30                                                     | -0.35                              |
| SL152 339  | 302.0               | 302.5                  | 8217              | 32.14                              | 46                                                   | 3.48                                    | 0.86                                          | 1.31                                            | 37.76                                                     | 0.11                               |
| SL152 345  | 305.0               | 305.5                  | 8313              | 31.75                              | 43                                                   | 3.42                                    | 0.85                                          | 1.24                                            | 37.04                                                     | -0.61                              |
| SL152 349  | 307.0               | 307.5                  | 8376              | 31.55                              | 52                                                   | 3.29                                    | 0.83                                          | 1.18                                            | 36.45                                                     | -1.20                              |
| SL152 356  | 310.5               | 311.0                  | 8486              | 31.27                              | 56                                                   | 3.34                                    | 0.84                                          | 1.21                                            | 36.70                                                     | -0.95                              |
| SL152 361  | 313.0               | 313.5                  | 8565              | 31.11                              | 51                                                   | 3.36                                    | 0.86                                          | 1.28                                            | 37.11                                                     | -0.54                              |
| SL152 365  | 315.0               | 315.5                  | 8627              | 30.99                              | 51                                                   | 3.38                                    | 0.88                                          | 1.33                                            | 37.21                                                     | -0.44                              |
| SL152 376  | 320.5               | 321.0                  | 8796              | 30.74                              | 43                                                   | 3.51                                    | 0.85                                          | 1.29                                            | 37.82                                                     | 0.17                               |
| SL152 386  | 325.5               | 326.0                  | 8950              | 30.63                              | 45                                                   | 3.49                                    | 0.85                                          | 1.26                                            | 37.48                                                     | -0.17                              |
| SL152 396  | 330.5               | 331.0                  | 9103              | 30.6                               | 35                                                   | 3.47                                    | 0.81                                          | 1.16                                            | 37.27                                                     | -0.38                              |
| SL152 406  | 335.5               | 336.0                  | 9256              | 30.68                              | 34                                                   | 3.52                                    | 0.87                                          | 1.31                                            | 37.68                                                     | 0.03                               |
| SL152 416  | 340.5               | 341.0                  | 9410              | 30.84                              | 35                                                   | 3.49                                    | 0.85                                          | 1.26                                            | 37.48                                                     | -0.17                              |
| SL152 426  | 345.5               | 346.0                  | 9564              | 31.11                              | 47                                                   | 3.52                                    | 0.85                                          | 1.27                                            | 37.69                                                     | 0.04                               |
| SL152 433  | 349.0               | 349.5                  | 9674              | 31.35                              | 43                                                   | 3.50                                    | 0.88                                          | 1.33                                            | 37.57                                                     | -0.08                              |
| SL152 436  | 355.0               | 356.0                  | 9871              | 31.9                               | 46                                                   | 3.54                                    | 0.86                                          | 1.31                                            | 37.95                                                     | 0.30                               |
| SL152 437  | 360.0               | 361.0                  | 10031             | 32.26                              | 51                                                   | 3.58                                    | 0.90                                          | 1.39                                            | 38.00                                                     | 0.35                               |
| SL152 439  | 370.0               | 371.0                  | 10355             | 32.38                              | 42                                                   | 3.64                                    | 0.91                                          | 1.44                                            | 38.55                                                     | 0.90                               |
| SL152 441  | 380.0               | 381.0                  | 10676             | 31.72                              | 42                                                   | 3.58                                    | 0.30                                          | 0.89                                            | 38.06                                                     | 0.41                               |
